# Supplementary material for: Implementing Innovative Approaches to Improve Health Care Delivery Systems for Integrating Communicable and Non-Communicable Diseases Using Tuberculosis and Diabetes as a Model in Tanzania
Source: MDPI journal article supplement (doi:10.3390/ijerph20176670), 2023-08-29
Supplement: s1 [file s1]

Table S1: Assessment tool: Nurse Officer (Cluster 1).

|   | Parameter for assessment                                                                   | Grading                                                                                                                                                                                                                                                                                                                                                                                      | Score |
|---|--------------------------------------------------------------------------------------------|----------------------------------------------------------------------------------------------------------------------------------------------------------------------------------------------------------------------------------------------------------------------------------------------------------------------------------------------------------------------------------------------|-------|
| 1 | Empower others HCW in the facility                                                         | a. Evidence of Ongoing Empowerment of all HCWs <b>(4-points)</b><br>b. Evidence of Train all staff but utilize only few CME sessions <b>(3-points)</b><br>c. Evidence of Empower only those working in TBDM Clinic <b>(2-points)</b><br>d. Evidence of Empower only facility in charge/ administrators <b>(1-point)</b><br>e. No evidence of any empowerment to other staff <b>(0 point)</b> |       |
| 2 | Trained staff at the assigned distant health facility                                      | a. Evidence of Training staff and ongoing practice in the assigned facility <b>(2-points)</b><br>b. Evidence of training but no ongoing practice in the facility <b>(1-point)</b><br>c. No evidence of training in the facility <b>(0 point)</b><br>d. Not Applicable                                                                                                                        |       |
| 3 | Trainer demonstrates knowledge/ ability/ skills/ on pharmacovigilance                      | a. Knowledge of pharmacovigilance and Evidence of practice <b>(2-points)</b><br>b. Knowledge of pharmacovigilance and no Evidence of practice <b>(1-point)</b><br>c. No insight on pharmacovigilance <b>(0-point)</b>                                                                                                                                                                        |       |
| 4 | Trainer demonstrates knowledge/ ability/ skills/ on IPC                                    | a. Knowledge of IPC and Evidence of practice <b>(2-points)</b><br>b. Knowledge of IPC and no Evidence of practice <b>(1-point)</b><br>c. No insight on IPC <b>(0-point)</b>                                                                                                                                                                                                                  |       |
| 5 | Prepared nursing care plan to patients with TB and associated comorbidity/ multi morbidity | Minimum required number is 15 i.e. 100% (15points)<br>a. $\frac{x}{15}$<br>Not applicable                                                                                                                                                                                                                                                                                                    |       |
| 6 | Quality of Generated care plans                                                            | a. Excellent <b>(4-points)</b><br>b. Very Good <b>(3-points)</b><br>c. Good <b>(2-points)</b><br>d. Satisfactory <b>(1-points)</b><br>e. Poor below <b>(0-point)</b><br>f. Not applicable                                                                                                                                                                                                    |       |
| 7 | Average Facility Performance reflecting cluster 1- Contribution                            | a. $\frac{x}{10}$<br>b. Not applicable                                                                                                                                                                                                                                                                                                                                                       |       |

Table S2: Assessment tool: Medical doctors/specialists (Cluster 1/mentors).

|   | Parameter                                                             | Grading                                                                                                                                                                                                                                                                                                                                                                                                                                                              | Score |
|---|-----------------------------------------------------------------------|----------------------------------------------------------------------------------------------------------------------------------------------------------------------------------------------------------------------------------------------------------------------------------------------------------------------------------------------------------------------------------------------------------------------------------------------------------------------|-------|
| 1 | Empower others HCW in the facility                                    | <ol style="list-style-type: none"> <li>1. Evidence of Ongoing Empowerment of all HCWs (<b>4 points</b>)</li> <li>2. Evidence of Train all staff but utilize only few CME sessions (<b>3points</b>)</li> <li>3. Evidence of Empower only those working in TBDM Clinic (<b>2 points</b>)</li> <li>4. Evidence of Empower only facility in charge/ administrators (<b>1point</b>)</li> <li>5. No evidence of any empowerment to other staff (<b>0 point</b>)</li> </ol> |       |
| 2 | Trained staff at the assigned distant health facility                 | <ol style="list-style-type: none"> <li>1. Evidence of Training staff and ongoing practice in the assigned facility (<b>2 points</b>)</li> <li>2. Evidence of training but no ongoing practice in the facility (<b>1 point</b>)</li> <li>3. No evidence of training in the facility (<b>0 point</b>)</li> <li>4. NA (for Regional Mentors)</li> </ol>                                                                                                                 |       |
| 3 | Trainer demonstrates knowledge/ ability/ skills/ on pharmacovigilance | <ol style="list-style-type: none"> <li>1. Knowledge of pharmacovigilance and Evidence of practice (<b>2points</b>)</li> <li>2. Knowledge of pharmacovigilance and no Evidence of practice (<b>1point</b>)</li> <li>3. No insight on pharmacovigilance (<b>0 point</b>)</li> </ol>                                                                                                                                                                                    |       |
| 4 | Screening for DM in TB populations                                    | <b>X/10</b>                                                                                                                                                                                                                                                                                                                                                                                                                                                          |       |
| 5 | Screening for TB in DM population                                     | <b>X/10</b>                                                                                                                                                                                                                                                                                                                                                                                                                                                          |       |
| 6 | Screened for other multimorbidity in dual TBDM population             | <ol style="list-style-type: none"> <li>1. <b>Very good</b>=Evidence of screening Hypertension, Malnutrition and HIV status (<b>2 points</b>)</li> <li>2. <b>Good</b>= Evidence of screening at least one multimorbidity (<b>1 point</b>)</li> <li>3. <b>Poor</b> = No evidence for screening multimorbidity (<b>0 point</b>)</li> </ol>                                                                                                                              |       |
| 7 | Interpretation of finding for clinically relevant action              | <ol style="list-style-type: none"> <li>a. <b>Very good</b>=Evidence of screening height and weight and interpretation of BMI (<b>2 Points</b>)</li> <li>b. <b>Good</b>= Evidence of screening Height and Weight with no interpretation (<b>1 point</b>)</li> <li>c. <b>Poor</b> = No evidence for screening BMI (<b>0 point</b>)</li> </ol>                                                                                                                          |       |
| 8 | HbA1c utilization practice                                            | <ol style="list-style-type: none"> <li>a. <b>X/10</b></li> <li>b. Not Applicable</li> </ol>                                                                                                                                                                                                                                                                                                                                                                          |       |
| 9 | Management of patients with dual TBDM comorbidity                     | <ol style="list-style-type: none"> <li>a. Very good=Evidence of re-arrangement clinic for attending patients with dual TBDM and other multimorbidity (<b>2 points</b>)</li> <li>b. Good= Partial evidence of re-arrangement for attending patients with dual TBDM and other multimorbidity (<b>1 point</b>)</li> <li>c. Poor = No evidence available (<b>0 point</b>)</li> <li>d. Not Applicable</li> </ol>                                                          |       |

|    |                                                               |                                                                                                                                                                           |  |
|----|---------------------------------------------------------------|---------------------------------------------------------------------------------------------------------------------------------------------------------------------------|--|
| 10 | Trainer demonstrated knowledge/ ability/ skills/ on IPC       | a. Knowledge of IPC and Evidence of practice <b>(2points)</b><br>b. Knowledge of IPC and no Evidence of practice <b>(1point)</b><br>c. No insight on IPC <b>(0 point)</b> |  |
| 11 | Average Facility Performance reflecting mentors- Contribution | X/10                                                                                                                                                                      |  |

Table S3: Assessment tool\_3. Performance of the cluster 1/cluster 2 health care facilities.

|   | Parameters                                                                                                                             | Grading                                                                                                                                                                                                                                                                                                            | Score |
|---|----------------------------------------------------------------------------------------------------------------------------------------|--------------------------------------------------------------------------------------------------------------------------------------------------------------------------------------------------------------------------------------------------------------------------------------------------------------------|-------|
| 1 | Facility in charge is aware and shows ownership in improving TBDM services (Any innovation/ Best practice for improving TBDM services) | a) Highly Oriented and committed (strong sense of ownership <b>(3points)</b><br>b) Oriented and shows some commitment <b>(2 points)</b><br>c) Was not oriented but demonstrates willingness to improve the services /Oriented but not willing <b>(1 point)</b><br>d) Not oriented and not willing <b>(0 point)</b> |       |
| 2 | A trained facility organizes clinics for managing patients with TB                                                                     | a) Presence of TB clinic <b>(2points)</b><br>b) Available plan to establish the clinic in the near future <b>(1points)</b><br>c) No TB clinic, no plan to establish the clinic in the near future <b>(0 point)</b>                                                                                                 |       |
| 3 | A trained facility organizes clinics for managing patients with DM                                                                     | a) Presence of DM clinic <b>(2points)</b><br>b) Available plan to establish the clinic in the near future <b>(1point)</b><br>c) No DM clinic, no plan to establish the clinic in the near future <b>(0point)</b><br>d) Not Applicable (depends on the level/capacity of the facility)                              |       |
| 4 | A trained facility organizes clinics for managing those clients with dual TB and DM and multi morbidities.                             | a) Presence of TBDM clinic <b>(2points)</b><br>b) Available plan to establish the clinic in the near future <b>(1point)</b><br>c) No TBDM clinic, no plan to establish the clinic in the near future <b>(0 point)</b><br>d) Not applicable depends on the level of facility                                        |       |
| 5 | A trained facility organizes referral of clients with dual TB and DM and multi morbidities.                                            | a) Presence of evidence of referred patients <b>(2 points)</b><br>b) Demonstrates an organized referral mechanism (tracking referred client) <b>(1 point)</b><br>c) No evidence of referred client or organized referral mechanism <b>(0 point)</b>                                                                |       |
| 6 | Pharmacovigilance                                                                                                                      | a) Presence of evidence of pharmacovigilance practice to patient                                                                                                                                                                                                                                                   |       |

|           |                                                                                                                                                     |                                                                                                                                                                                                                                                                                                                                                                          |  |
|-----------|-----------------------------------------------------------------------------------------------------------------------------------------------------|--------------------------------------------------------------------------------------------------------------------------------------------------------------------------------------------------------------------------------------------------------------------------------------------------------------------------------------------------------------------------|--|
|           |                                                                                                                                                     | <p>who have experienced severe adverse events <b>(2 points)</b></p> <p>b) Demonstrate knowledge of pharmacovigilance but no evidence of practice <b>(1 point)</b></p> <p>c) Absence of evidence and knowledge and practice of pharmacovigilance <b>(0 point)</b></p>                                                                                                     |  |
| <b>7</b>  | A trained facility considered IPC particularly the clinics arrangements<br>(Documentation/posters of IPC for the best practice available at the HF) | <p>a) Presence of evidence of IPC practice <b>(2 points)</b></p> <p>b) Demonstrate knowledge of IPC but no evidence of practice <b>(1 point)</b></p> <p>c) Absence of evidence and knowledge and practice of IPC <b>(0 point)</b></p>                                                                                                                                    |  |
| <b>8</b>  | A trained Facility screen for DM in TB population and actively use DM screening register in TB unit                                                 | <p>a) Demonstrate evidence of screening all TB patients for DM <b>(2 points)</b></p> <p>b) Demonstrate Partial evidence of screening TB for DM <b>(1-point)</b></p> <p>c) No evidence of screening TB for DM <b>(0-point)</b></p>                                                                                                                                        |  |
| <b>9</b>  | A trained facility screen for TB in DM population and actively use TB presumptive register.                                                         | <p>a) Demonstrate evidence of screening all DM patients for TB <b>(2 points)</b></p> <p>b) Demonstrate Partial evidence of screening DM for TB <b>(1-point)</b></p> <p>c) No evidence of screening TB for DM <b>(0-point)</b></p> <p>d) Not Applicable</p>                                                                                                               |  |
| <b>10</b> | Other comorbidities such as hypertension, BMI, are screened and documented                                                                          | <p>a) Demonstrate evidence of screening TB or DM or dual TBDM patients for other multi morbidities <b>(2- points)</b></p> <p>b) Demonstrate Partial evidence of screening TB or DM or dual TBDM patients for other multi morbidities <b>(1-point)</b></p> <p>c) No evidence of screening TB or DM or dual TBDM patients for other multi morbidities <b>(0 point)</b></p> |  |
