# Supplementary material for: Implementing Innovative Approaches to Improve Health Care Delivery Systems for Integrating Communicable and Non-Communicable Diseases Using Tuberculosis and Diabetes as a Model in Tanzania
Source: Int J Environ Res Public Health. 2023 Aug 29;20(17):6670. doi: 10.3390/ijerph20176670 (PMC10487244; doi:10.3390/ijerph20176670)
Supplement: Supplementary file 1 [file ijerph-20-06670-s001.zip › Supplementary SII.xlsx]

## Sheet: Tool 1A-TB DIAGNOSIS
	CLINICAL AUDIT TOOL 1
	SCREENING OF TB IN GENERAL OUTPATIENTS &HIV CLINICS
	STANDARD
	All persons with otherwise unexplained productive cough should be evaluated for tuberculosis. The most common symptom of pulmonary tuberculosis is persistent productive cough, often accompanied by constitutional symptoms, such as fever, night sweats, coughing up blood (haemoptysis), chest pain, shortness of breath and weight loss
	UPPER RESPIRATORY TRACT INFECTION (n=1118 )
	Patient ID	Date Attended	TB Cardinal Features	Symptom Picked Scores	TB Test Requested
1	2020/03	2020-01-10	cough	1= 1 screened symptoms	1= Smear or Gene-expert
2	2020/01	2020-02-10	cough	1= 1 screened symptoms	0=None
3	2020/01	2020-05-19	cough	1= 1 screened symptoms	0=None
4	2020/02	2020-05-20	cough	1= 1 screened symptoms	0=None
5	2020/06	2020-05-27	fever	1= 1 screened symptoms	0=None
6	2020/01	2020-06-02	cough	1= 1 screened symptoms	1= Smear or Gene-expert
7	2020/03	2020-06-03	cough	1= 1 screened symptoms	1= Smear or Gene-expert
8	2020/02	2020-07-03	cough	1= 1 screened symptoms	0=None
9	2020/05	2020-07-27	cough	1= 1 screened symptoms	1= Smear or Gene-expert
10	2020/03	2020-07-06	cough	1= 1 screened symptoms	0=None
11	2020/21	2020-08-17		0=not screened	0=None
12	2020/06	2020-07-13	fever	1= 1 screened symptoms	0=None
13	2020/22	2020-08-17		0=not screened	0=None
14	2020/25	2020-12-30	cough	1= 1 screened symptoms	0=None
15	2020/17	2020-01-25		0=not screened	0=None
16	2020/27	2020-05-08	fever	1= 1 screened symptoms	0=None
17	2020/127	2020-06-30	fever	1= 1 screened symptoms	0=None
18	2020/133	2020-11-30	fever	1= 1 screened symptoms	0=None
19	2020/34	2020-05-09		0=not screened	0=None
20	2020/118	2020-02-15		0=not screened	0=None
				Total Score 15/140	Total Score 2/20
	LOWER RESPIRATORY TRACT INFECTION/PNEUMONIA (n= 80 )
	Patient ID	Date Attended	TB Cardinal Features	Symptom Picked Scores	TB Test Requested

## Sheet:  Tool 1B-TB DIAGNOSIS IN HIV
		SCREENING OF TB IN PEOPLE WITH ADVANCED HIV
		STANDARDS
		PLWH presenting with signs and symptoms of sepsis need to be evaluated and managed for TB or Sepsis or both.
	PLWH presenting with Temp 39 or above
SN	Patient ID	Date Attended	Features of TB sepsis	Scores for Picked Features	TB Tests	Treatment	Outcome
1	11060102-001370	2020-03-13	CD4 cell count less than or equal to 200cells/microlittre	1=1feature	1=Smear	treated with antibiotics	dead
2
3								ALMOST ALL THE CTC PATIENTS ARE NOT MEASURED TEMPERATURE
4
5
6
7
8
9
10
11
12
				Total Score 1/36	Total Score 1/24
	PLWH presenting with Respiratory rate 30 or above
SN	Patient ID	Date Attended	Features of TB sepsis	Scores for Picked Features	TB Tests	Treatment	Outcome
1
2
3
4
5
6								VITAL SIGNS ARE NOT CHECKED TO ALL THE CTC PATIENTS
7
8
9
10
11
12
				Total Score ______/36	Total Score __/24
	PLWH presenting with Pulse rate 120b/min or above
SN	Patient ID	Date Attended	Features of TB sepsis	Scores for Picked Features	TB Tests	Treatment	Outcome
1
2								VITAL SIGNS ARE NOT CHECKED TO ALL THE CTC PATIENTS
3
4
5
6
7
8
9
10
11
12
				Total Score ______/36	Total Score __/24
	PLWH presenting with CD4 cell count 200 cells/microlliter or above
SN	Patient ID	Date Attended	Features of TB sepsis	Scores for Picked Features	TB Tests	Treatment	Outcome
1
2
3
4
5
6
7
8
9
10
11
12

## Sheet: Tool 2 BI-DI
	CLINICAL AUDIT TOOL 2
		BI-DIRECTIONAL SCREENING FOR TB & DM AND ASSOCIATED CORMOBIDITIES
	STANDARD
	All diabetes patients should be screened for TB at the time of diagnosis and at follow-up visits
	A: CHECKLIST FOR ASSESSING DM SCREENING &OTHER CORMOBIDITIES (HYPERTENSION&MALNUTRITION) IN TB CLIENTS
SN	Indicator	Means of Verification	Scores
1	Screening of DM in TB Patients	Documents Review
	# All TB patient registered	Check in TB 03, ETL, Patient file
	# TB patient with known DM	check for evidence
	#TB Patients with Pre-Diabetes	Check for evidence
	#TB Patients with newly diagnosed DM	Check for evidence
	TB patients assessed for typical features of DM such as
	#with Polydypsia	Check for evidence
	# with Polyphagia	Check for evidence
	# with Polyuria	Check for evidence
	#TB Patients assessed for DM with FBG	Check for evidence
	#TB Patients assessed for DM with RBG	Check for evidence
	Proper interpretation of results
	FBG	Check for evidence
	RBG	Check in TB 03, ETL, Patient file
	Appropriate linkage of the identified TB/DM patients	Check for evidence
2	Screening of Hypertension in TB Patients
	#TB patients cheked for blood pressure	check for evidence
	#TB patients with elevated blood pressure at least 3 readings in different visit	check for evidence
3	Screening of Malnutrition in TB
	#TB Patients measured for body weight	check for evidence
	#TB Patients measured for height	check for evidence
	# appropriate BMI interpretation	check for evidence
	# of SAM with appropriate management	Check for evidence
	B: CHECKLIST FOR ASSESSING SCREENING OF TB AND OTHER CORMOBIDITIES IN DM CLIENTS
	STANDARD
	All new TB patients should be screened for diabetes at the start of TB treatment using the diabetes screening questionnaire to identify those with symptoms and signs of diabetes. Random blood glucose (RBG) and fasting blood glucose (FBG) tests should be performed per the algorithm for diagnosis of diabetes among TB patients
SN	Indicator	Means of Verification	Score
1	Screening of TB in DM patients
	#Patients documented with cough	presumptive register
	#Patient's documented with fever	presumptive register
	#Patient's documented with weight loss	presumptive register
	Investigations ordered
	Sputum for Gene X-pert	presumptive register
	Chest X-ray
	# TB cases identified	presumptive register
	#linkage to TB services	presumptive register
2	Screening of Hypertension in DM patients
	#DM patients checked for Blood Pressure	Check for evidence
	# DM patients documented with elevatedBP >140/90 within 1year
	# patients identified with hypertension as per Algorithm	Check for evidence
3	Screening of Malnutrition in DM patients
	#DM patients measured for body weight	Check for evidence
	#DM patients measured for Height	Check for evidence
	#Appropriate BMI interpretation	Check for evidence
		Total scores

## Sheet: Tool3-TBDM MNX
		CLINICAL AUDIT TOOL 3:
		MANAGEMENT OF TB DM AND OTHER ASSOCIATED COMORBIDITIES
			STANDARD
	Management of patient with dual TB & DM either co-infected with HIV or not, the treatment will follow the standards TB treatment guideline and DM management will be in accordance with HbA1c glycaemic levels as follows. (Refer to the word document Clinical Audit Tool 5 pg 5-6)
SN	Patient	HBA1C	Clinical	Assessment of	Management of	Reported	Linkage back to
	ID	Status	Management	Complication	Cormobidities	Adverse Events	Respective Clinic
1
2								NO TBDM PATIENTS IN THE YEAR 2020
3
4
5
6
7
8
9
10
11
12
	Total scores	_________ out of 11

## Sheet:  Dataset
IPC GUIDELINE	SPUTUM SOP	HAND HYGIENE SOP	HAND WASHING FACILITIES	TRIAGING											Tool 3		screening	interpretation	CLD symptoms	Investigation	Diagnosis	Features Score	Treatment	Treatment Score	Nursing Care plan	Assessment data	Nursing Diagnosis	Planning	Nursing Intervention	Evaluation	Outcome
					Not applicable(N/A)			0=No plan of Health Education
0=not Available at the facility	0= not available	0= not available	0= Hand washing facilities not available	Not applicable	0=no Tb or DM	0=No ventilated room	0=IPC not considered in the sitting arrangement	1=Education plan inplace	Mild	0= No management done	0 =No assessment	0=No mangement	0=No	0=No linkage
1=Available at the facility	1= available	1= available	1= Inadequate Hand washing facilities	0=no Triaging	1=Presence of TB or DM clinic	1=Inadequate ventilation(no cross ventilation)	1=IPC partially considered in the sitting arrangement	2=Education plan covering cough/sneezing and hand hygiene	Moderate	1= Inappropriate Management	1=Less than 2 items assesed	1=Innappropriate Mnx	1=Yes but not filled the form	1=linkage back	0= not Adhered to protocol	0=no management	0=less than 5%	0=less than 5%	shortness of breath		Not applicable
2=Available & Accessible at the clinic	2= available and accesible	2= available and accesible	2= Adequate Hand washing facilities (running water/soap/sanitizer)	1= Triaging of coughers at the Clinic	2=Presence of organized TB/DM clinic	2=adequte ventilation (presence of cross ventilation)	2=IPC considered in the sitting arrangement	3=Health education provided and documented	Severe	2=Appropriate Management	2= 2-4 items	2=Appropriate Mnx	2=Yes filled the form	*DM/HIV clinic	1= Adhered to protocol	1=Inappropriate Management	1= 5-14%	1= 5-14%	gradual worsen breathlessness	0=No Tests	Asthma	0= None	Bronchiodilator (salbutamol)	0=None	0=No nursing care plan	0=not documented	0=no nursing diagnosis formulated	0= no goal of care	0=No intervention documented	NA	Unknown
3=Available & Accessible at the clinic&trained	3=available, accesible and trained	3= available, accesible and trained			3=Presence of organized TB/DM/HIV clinic		*sitting should be against the cross ventilation between patients &clinicians		Not Done	*Appropriate Mnx is defined as management as per standard considering HBA1C status & ART regimen	3=more than four items assessed	*Assess Mnx of Hypertension &malnutrition if not applicable deduct 2 mark from the denominator	3= Yes filled the form & managed accordingly		*Protocol: All MTB negative,non PTB	2=Appropriate Management	2=15-24%	2=15-24%	Fatigue	1=CXR	COPD	1=1features	Inhaled steroids	1=1 drug category	1=nursing care plan available but outdated	1=partially documented	1=nursing diagnosis unclear	1=goals unrealistic/unmeasurable	1=intervention partially documented	0=not done	Not improved
	*Duration of SOP training should be within 3 years	*Duration of SOP training should be within 3 years			*Organized clinic defined as a special clinic attended by a senior (MD/Specialist)						* items (RFT,LFT, FBP, Diabetic foot, Neuropathy &retinopathy )				should be evaluated for NC-CLD		3=25-34%	3=25-34%	Chest pain	2= Spirometry/peak flow ± CXR	PTLD (TB sequel)	2=2 features	antibiotics	2=2 drug categories	2=nursing care plan available and updated	2=documented	2=Clear nursing diagnosis	2= SMART goals formulated	2=Intervention documented	1= done	Improved
															&managed accordingly		4=35-44%	4=35-44%	chronic cough		COPD*(Chronic Bronchitis, Bronchiectasis &Emphysema)	3=3 features	Muscarinic (Ipratropium)	3=3 drug categories		*Assessment data should include		*SMART refers to specific, measurable,		*NA Refers to immediate
																	5=45-54%	5=45-54%	Sputum production			4=4features	theophylline(Aminophylline)			physical, psychological, social,		Achievable, Realistic, Timely		refferal or death
0= not Available at the facility	0= not available	0= not available	0= Hand washing facilities not available	0= No airborne precautions		0=No ventilated room		0=No plan of Health Education									6=55-64%	6=55-64%	Wheezes			5=5features				&nutritional status				*denominator might
1=Available at the facility	1=available	1= available	1= Inadequate Hand washing facilities	1=Partial airborne precautions observed		1=Inadequate ventilation(no cross ventilation)		1=Education plan inplace									7=65-74%	7=65-74%	History of previous TB TX			6=6 features								change if NA is an option
2=Available & Accessible in the ward	2= available and accesible	2= available and accesible	2= Adequate Hand washing facilities (running water/soap/sanitizer)	2=Airborne precautions were fully observed		2=adequte ventilation (presence of cross ventilation)		2=Education plan covering cough/sneezing and hand hygiene									8=75-84%	8=75-84%	Reccurent Chest Infection
3=Available & Accessible in the ward & trained	3=available, accesible and trained	3= Hand hygiene SOP available, accesible and trained		*Airbone precautions defined as distance between beds,				3=Health education provided and documented									9=85-94%	9=85-94%	History of smoking/expose to Biomass fuel
	*Duration of SOP training should be within 3 years	*Duration of SOP training should be within 3 years	Temp greater than or equal to 390C	patients's sorting & observed sputum conversion rate													10=more than 95%	10=more than 95%
																	*n/N (number of screened patients	all screened for DM & interpreted
			Respiratory rate greater than or equal to 30Br/min														over total number of registered clients	over total number of all screened for DM
			Pulse rate greater than or equal to 120b/min	0=None	0=not screened	treated with antibiotics	improved										minus known DM)	using glucometer(RBG or FBG)
cough	Not Applicable	0=not screened	CD4 cell count less than or equal to 200cells/microlittre	1=1feature	1=partial screened less than 2 symptoms	treated for tb	dead
fever	0=None	1= 1 screened symptoms		2=2 features	2=partial screened 2 to 4 Symptoms	other treatment options	unknown													hypertension in Dm-screening	algorithm	DM PATIENT CHECKED WEIGHT	DM PATIENT CHECKED HEIGHT	DM PATIENT BMI
Night Sweat	1= Smear or Gene-expert	2= 2 screened symptoms		3=3features	3= screened 5 to 6 symptoms												clinic linkage	hypertension	Presumptive register records
chest pain		3= 3 screened symptoms																				0=less than 5%	0=less than 5%	0=less than 5%
Dyspnoea		4= 4 screened symptoms															0=less than 5%	0=less than 5%	0=No presumptive register/not documented	0=less than 5%	0=less than 5%	1= 5-14%	1= 5-14%	1= 5-14%
Loss of Apetite		5= 5 screened symptoms	0=No test														1= 5-14%	1= 5-14%	1=Partially documented	1= 5-14%	1= 5-14%	2=15-24%	2=15-24%	2=15-24%
Weight loss		6= 6 screened symptoms	1=Smear														2=15-24%	2=15-24%	2= documented	2=15-24%	2=15-24%	3=25-34%	3=25-34%	3=25-34%
		7= 7 screened symptoms	2=Genexpert for Tb/LAM														3=25-34%	3=25-34%		3=25-34%	3=25-34%	4=35-44%	4=35-44%	4=35-44%
																	4=35-44%	4=35-44%		4=35-44%	4=35-44%	5=45-54%	5=45-54%	5=45-54%
																	5=45-54%	5=45-54%		5=45-54%	5=45-54%	6=55-64%	6=55-64%	6=55-64%
																	6=55-64%	6=55-64%		6=55-64%	6=55-64%	7=65-74%	7=65-74%	7=65-74%
																	7=65-74%	7=65-74%		7=65-74%	7=65-74%	8=75-84%	8=75-84%	8=75-84%
			Respiratory rate greater than or equal to 30Br/min														8=75-84%	8=75-84%		8=75-84%	8=75-84%	9=85-94%	9=85-94%	9=85-94%
																	9=85-94%	9=85-94%		9=85-94%	9=85-94%	10=more than 95%	10=more than 95%	10=more than 95%
			Temp greater than or equal to 390C														10=more than 95%	10=more than 95%		10=more than 95%	10=more than 95%	*n/N (number of DM Patients screened	*n/N (number of DM Patients screened	*n/N (number of DM Patients with BMI
			Pulse rate greater than or equal to 120b/min														*n/N(number of those linked	*n/N (number of TB Patients screened		*n/N (number of DM Patients screened	*Algorithm=Average≥ 2 measurements	for weight over total number	for height over total number	Interpretation over total number
			CD4 cell count less than or equal to 200cells/microlittre														to TBDM clinic over total number	for hypertension over total number		for hypertension over total number	Stage 1 HTN BP 140/90-159/99	of registered DM Patients )	of registered DM Patients )	of registered DM Patients)
																	of those diagnosed with TBDM)	of registered TB Patients )		of registered DM Patients )	Stage 2 HTN BP ≥160/100
																					Stage 1 HTN followup within 1-4weeks
																	Weight	Height			Stage 2 HTN start treatment immediately
																	0=less than 5%	0=less than 5%
			0=No test														1= 5-14%	1= 5-14%
			1=Smear														2=15-24%	2=15-24%
			2=Genexpert for Tb/LAM														3=25-34%	3=25-34%
																	4=35-44%	4=35-44%
			Pulse rate greater than or equal to 120b/min														5=45-54%	5=45-54%
																	6=55-64%	6=55-64%
																	7=65-74%	7=65-74%
			Temp greater than or equal to 390C														8=75-84%	8=75-84%
			Respiratory rate greater than or equal to 30Br/min														9=85-94%	9=85-94%
			CD4 cell count less than or equal to 200cells/microlittre														10=more than 95%	10=more than 95%
																	*n/N (number of TB Patients screened	*n/N (number of TB Patients screened
																	for weight over total number	for height over total number
																	of registered TB Patients )	of registered TB Patients )
			0=No test
			1=Smear														BMI Interpretation	SAM Management
			2=Genexpert for Tb/LAM
																	0=less than 5%	0=less than 5%
																	1= 5-14%	1= 5-14%
			CD4 cell count less than or equal to 200cells/microlittre														2=15-24%	2=15-24%
																	3=25-34%	3=25-34%
			Temp greater than or equal to 390C														4=35-44%	4=35-44%
			Respiratory rate greater than or equal to 30Br/min														5=45-54%	5=45-54%
			Pulse rate greater than or equal to 120b/min														6=55-64%	6=55-64%
																	7=65-74%	7=65-74%
																	8=75-84%	8=75-84%
																	9=85-94%	9=85-94%
			0=No test														10=more than 95%	10=more than 95%
			1=Smear														*n/N (number of TB Patients with BMI	*n/N (number of TB Patients
			2=Genexpert for Tb/LAM														Interpretation over total number	managed appropriate for SAM over total number
																	of registered TB Patients)	of registered TB SAM Patients )

## Sheet: Tool 4- NURSING PROCESS 
		CLINICAL AUDIT TOOL 4
		NURSING PROCESS APPLICATION
		STANDARD
		Each patient should have a clinical record which contain sufficient information including an intake history and physical examination that supports the diagnosis, justify the treatment, document the course and results of treatment and promote continuity of care.
		Nursing and midwives should apply nursing process in provision of care
		Nursing care plans are updated after each shift.
	Patient ID	Date	Nursing care	Assessment	Nursing	Planning	Nursing	Evaluation	Outcome
SN		Attended	Plan	Assessment	Diagnosis		Intervention
1
2
3
4
5
6
7
8
9
10
11
12
